# Supplementary material for: Seroprevalence of anti-SARS-CoV-2 IgG antibodies among truck drivers and assistants in Kenya
Source: bioRxiv or medRxiv preprint supplement (doi:10.1101/2021.02.12.21251294), 2021-02-17
Supplement: Supplementary file [file media-1.pdf]

# Supplement

## Seroprevalence of anti-SARS-CoV-2 IgG antibodies among truck drivers and assistants in Kenya

E Wangechi Kagucia,<sup>1</sup> John N Gitonga,<sup>1</sup> Catherine Kalu,<sup>1</sup> Nickline Kuya,<sup>2</sup> Benard Ochieng,<sup>2</sup> Eric Ochomo,<sup>2</sup> Angela Karani,<sup>1</sup> James Nyagwange,<sup>1</sup> Boniface Karia,<sup>1</sup> Daisy Mugo,<sup>1</sup> Henry K Karanja,<sup>1</sup> James Tuju,<sup>1</sup> Agnes Mutiso,<sup>1</sup> Hosea Maroko,<sup>3</sup> Lucy Okubi,<sup>3</sup> Eric Maitha,<sup>4</sup> Hossan Ajuck,<sup>4</sup> Mary Bogita,<sup>4</sup> Richmond Mudindi,<sup>4</sup> David Mukabi,<sup>5</sup> Wycliffe Moracha,<sup>5</sup> David Bulimu,<sup>5</sup> Nelson Andanje,<sup>5</sup> Evans Shiraku,<sup>5</sup> Rosemary Okuku,<sup>5</sup> Monicah Ogutu,<sup>5</sup> Rashid Aman,<sup>6</sup> Mercy Mwangangi,<sup>6</sup> Patrick Amoth,<sup>6</sup> Kadondi Kasera,<sup>6</sup> Wangari Ng'ang'a,<sup>7</sup> Rodgers Mariga,<sup>5</sup> Tobias Munabi,<sup>5</sup> Susan M Ramadhan,<sup>5</sup> Janet Mwikali,<sup>5</sup> Rose Nasike,<sup>5</sup> Cornelius Andera,<sup>5</sup> Roselyne Nechesa,<sup>5</sup> Benson K Kiplagat,<sup>5</sup> Julius Omengo,<sup>5</sup> Simon Oteba,<sup>5</sup> Arthur Mwangi,<sup>4</sup> Dorcas Mkanyi,<sup>4</sup> George Karisa,<sup>4</sup> Judith K Migosi,<sup>4</sup> Patrick Msili,<sup>4</sup> Samson Mwambire,<sup>4</sup> Anthony M Boniface,<sup>4</sup> Amek Nyaguara,<sup>1</sup> Shirine Voller,<sup>1,8</sup> Mark Otiende,<sup>1</sup> Christian Bottomley,<sup>8</sup> Charles N Agoti,<sup>1</sup> Lynette I Ochola-Oyier,<sup>1</sup> Ifedayo M O Adetifa,<sup>1,8</sup> Anthony O Etyang,<sup>1</sup> Katherine E Gallagher,<sup>1,8</sup> Sophie Uyoga,<sup>1</sup> Edwine Barasa,<sup>1</sup> Philip Bejon,<sup>1,9</sup> Benjamin Tsofa,<sup>1</sup> Ambrose Agweyu,<sup>1\*</sup> George M Warimwe,<sup>1,9\*</sup> J Anthony G Scott<sup>1,8,9\*</sup>

<sup>1</sup>KEMRI-Wellcome Trust Research Programme, Kilifi, Kenya

<sup>2</sup>KEMRI Center for Global Health Research (CGHR), Kisumu, Kenya

<sup>3</sup>KEMRI Center for Infectious and Parasitic Diseases Control Research, Alupe, Kenya

<sup>4</sup>Department of Health, Kilifi County, Kenya

<sup>5</sup>Department of Health, Busia County, Kenya

<sup>6</sup>Ministry of Health, Government of Kenya, Nairobi, Kenya

<sup>7</sup>Presidential Policy and Strategy Unit, The Presidency, Government of Kenya

<sup>8</sup>Department of Infectious Disease Epidemiology, London School of Hygiene and Tropical Medicine, UK

<sup>9</sup>Nuffield Department of Medicine, Oxford University, UK

\*These authors contributed equally to this work

**Supplementary Table 1.** Reported county of residence among Kenyan truckers

| <b>County</b>    | <b>Frequency</b> | <b>Percent</b> | <b>County</b>              | <b>Frequency</b> | <b>Percent</b> |
|------------------|------------------|----------------|----------------------------|------------------|----------------|
| MOMBASA          | 156              | 23.4           | KIRINYAGA                  | 4                | 0.6            |
| UASIN GISHU      | 76               | 11.4           | LAIKIPIA                   | 4                | 0.6            |
| NAKURU           | 67               | 10.0           | SIAYA                      | 4                | 0.6            |
| NAIROBI          | 60               | 9.0            | KITUI                      | 3                | 0.5            |
| KIAMBU           | 41               | 6.1            | MANDERA                    | 3                | 0.5            |
| BUSIA            | 40               | 6.0            | EMBU                       | 2                | 0.3            |
| MACHAKOS         | 18               | 2.7            | KAJIADO                    | 2                | 0.3            |
| KWALE            | 14               | 2.1            | SAMBURU                    | 2                | 0.3            |
| BUNGOMA          | 13               | 2.0            | GARISSA                    | 1                | 0.2            |
| KAKAMEGA         | 13               | 2.0            | HOMABAY                    | 1                | 0.2            |
| KISUMU           | 13               | 2.0            | KISII                      | 1                | 0.2            |
| KERICHO          | 8                | 1.2            | MIGORI                     | 1                | 0.2            |
| MAKUENI          | 8                | 1.2            | TAITA TAVETA               | 1                | 0.2            |
| TRANS NZOIA      | 6                | 0.9            | <i>Uganda</i>              | 1                | 0.2            |
| MURANGA          | 5                | 0.8            | <i>Missing<sup>a</sup></i> | 91               | 13.7           |
| NYERI            | 5                | 0.8            | Total                      | 668              | 100            |
| ELGEIYO MARAKWET | 4                | 0.6            |                            |                  |                |

<sup>a</sup>County of residence not available for 90 of 101 truckers sampled at Magarini due to differences in the data collection form used; County of residence not collected for 1 trucker sampled at Malaba

**Supplementary Table 2.** Distribution of characteristics by site. Tests for heterogeneity conducted using analysis of variance (age) or chi-squared tests (all other variables)

| Characteristic                                                        | Busia OSBP  |          | Magarini    |          | Malaba OSBP |          | p-values |
|-----------------------------------------------------------------------|-------------|----------|-------------|----------|-------------|----------|----------|
|                                                                       | N= 365      |          | N= 101      |          | N= 364      |          |          |
| <b>Mean age (SD), range<sup>a</sup></b>                               | 41.0y (9.6) | 20 – 68y | 38.4y (9.3) | 20 - 61y | 42.3y (9.9) | 19 – 78y | 0.002    |
| <b>Male, %</b>                                                        | 363         | 99.5%    | 100         | 99.0%    | 364         | 100%     | 0.249    |
| <b>NAT positive, %<sup>b</sup></b>                                    | 15          | 4.3%     | 25          | 26.9%    | 18          | 5.2%     | <0.001   |
| <b>Kenyan, %</b>                                                      | 294         | 80.5%    | 73          | 72.3%    | 301         | 82.7%    | 0.065    |
| <b>Symptoms, %</b>                                                    | 0           | 0%       | 0           | 0%       | 0           | 0%       | N/A      |
| <b>Temperature <math>\geq 37.5^{\circ}\text{C}</math><sup>c</sup></b> | 0           | 0%       | 0           | 0%       | 1           | 0.3%     | 0.547    |

Abbreviations: NAT, nucleic acid testing; OSBP, One Stop Border Post

<sup>a</sup>Missingness: Magarini = 2; Malaba = 1

<sup>b</sup>Missingness: Busia = 17; Magarini = 8; Malaba = 20

<sup>c</sup>Missingness: Busia = 12; Magarini = 17; Malaba = 1

**Supplementary Table 3.** Stratum-specific tests for heterogeneity using crude anti-SARS-CoV-2 IgG seroprevalence

|                        | <b>N</b> | <b>Seropositive</b> | <b>% Crude anti-SARS-CoV-2 IgG seroprevalence</b> | <b>95% CI</b> | <b>p-value</b>     |
|------------------------|----------|---------------------|---------------------------------------------------|---------------|--------------------|
| <b>Age<sup>a</sup></b> |          |                     |                                                   |               |                    |
| <30y                   | 92       | 42                  | 45.7                                              | 35.2 – 56.4   | 0.144 <sup>a</sup> |
| 30-39y                 | 276      | 110                 | 39.9                                              | 34.0 – 45.9   |                    |
| 40-49y                 | 286      | 116                 | 40.6                                              | 34.8 – 46.5   |                    |
| 50-59y                 | 135      | 48                  | 35.6                                              | 27.5 – 44.2   |                    |
| >60y                   | 38       | 13                  | 34.2                                              | 19.6 – 51.4   |                    |
| <b>Sex</b>             |          |                     |                                                   |               |                    |
| Male                   | 827      | 326                 | 39.4                                              | 36.1 – 42.8   | 0.062 <sup>b</sup> |
| Female                 | 3        | 3                   | 100.0                                             | 29.2 – 100.0  |                    |
| <b>NAT result</b>      |          |                     |                                                   |               |                    |
| Positive               | 58       | 32                  | 55.2                                              | 41.5 – 68.3   | 0.007              |
| Negative               | 727      | 270                 | 37.1                                              | 33.6 – 40.8   |                    |
| <b>Nationality</b>     |          |                     |                                                   |               |                    |
| Kenya                  | 668      | 262                 | 39.2                                              | 35.5 – 43.0   | 0.618              |
| Other                  | 162      | 67                  | 41.4                                              | 33.7 – 49.4   |                    |
| <b>Site</b>            |          |                     |                                                   |               |                    |
| Busia OSBP             | 365      | 163                 | 44.7                                              | 39.5 – 49.9   | 0.009              |
| Magarini               | 101      | 43                  | 42.6                                              | 32.8 – 52.8   |                    |
| Malaba OSBP            | 364      | 123                 | 33.8                                              | 28.9 – 38.9   |                    |

Abbreviations: NAT, nucleic acid test; OSBP, One Stop Border Post; SARS-CoV-2, severe acute respiratory syndrome coronavirus 2; TDA, truck drivers and assistants

<sup>a</sup>Chi-square test for trend performed

<sup>b</sup>Fisher's exact test performed

**Supplementary Figure 1.** Map of Kenya showing the serosurvey sites

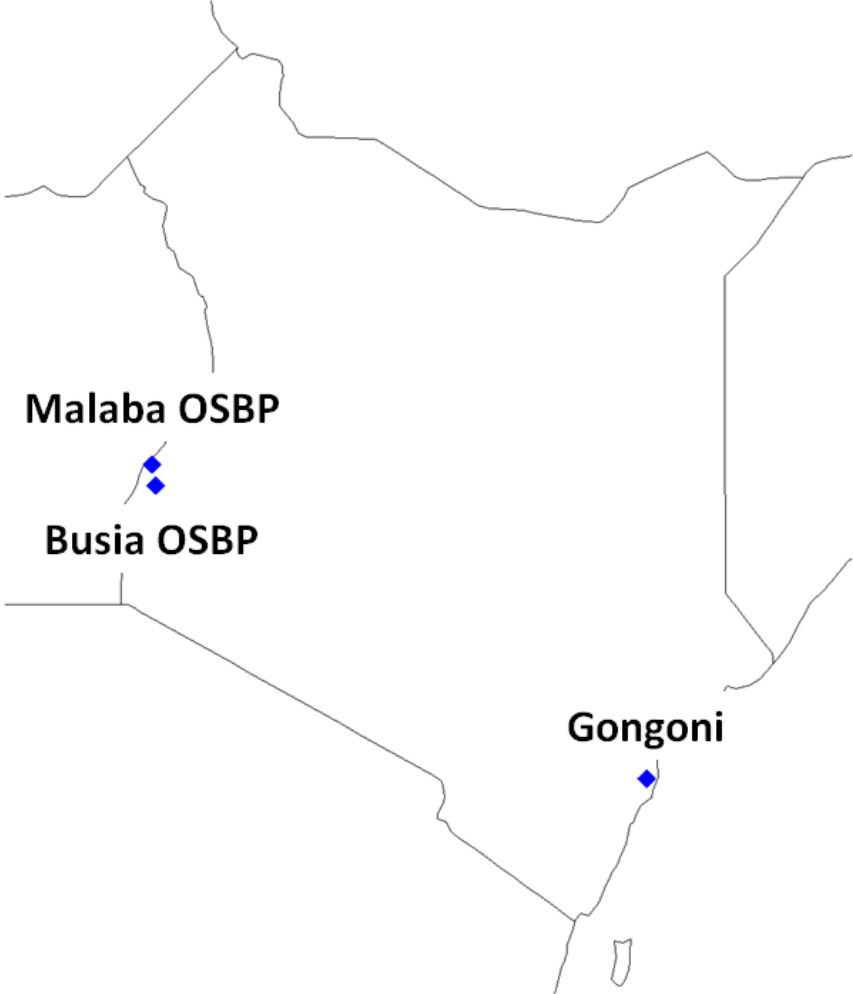

**Supplementary Figure 2.** Map showing the Northern Corridor road network which is used to transport freight from Mombasa, Kenya to other East African countries through Busia OSBP and Malaba OBSP, among other ports. Map from the Northern Corridor Transit and Transport Coordination Authority.<sup>1</sup>

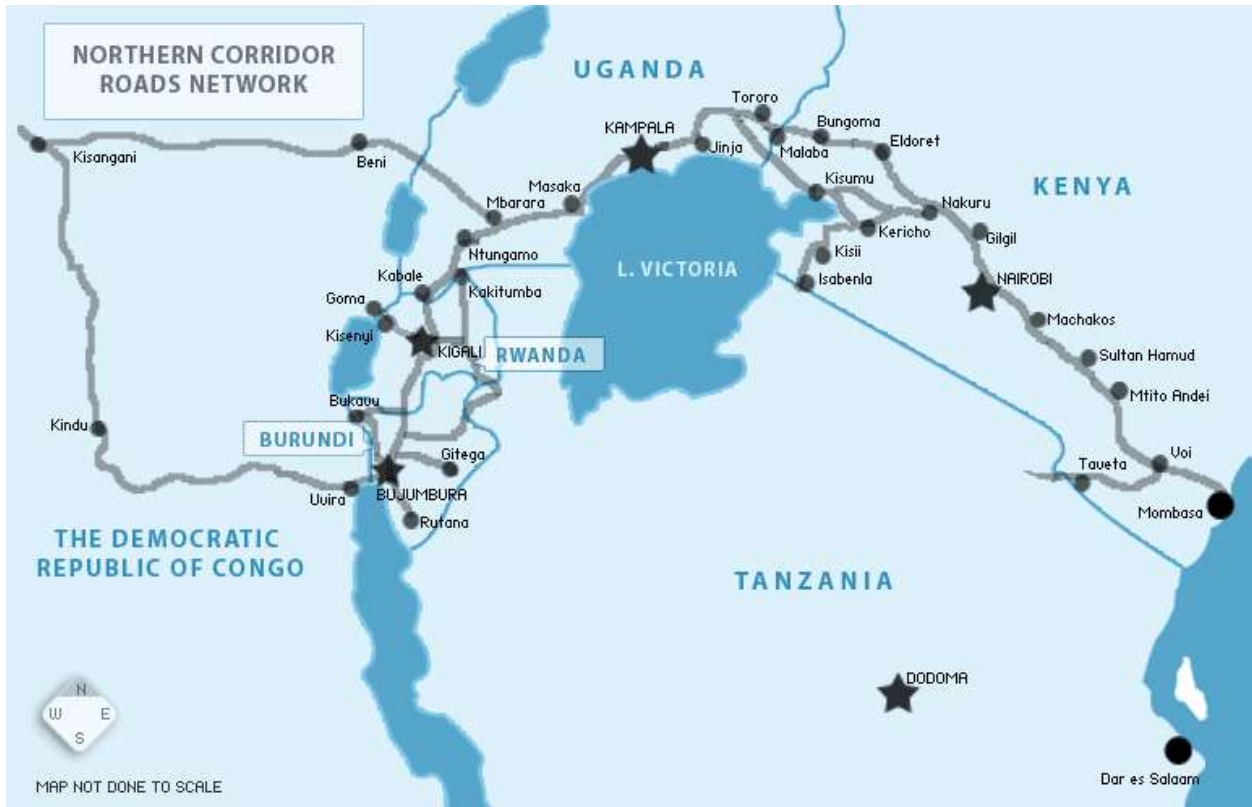

Supplementary Figure 3. Flow of TDA included in the SARS-CoV-2 serosurvey

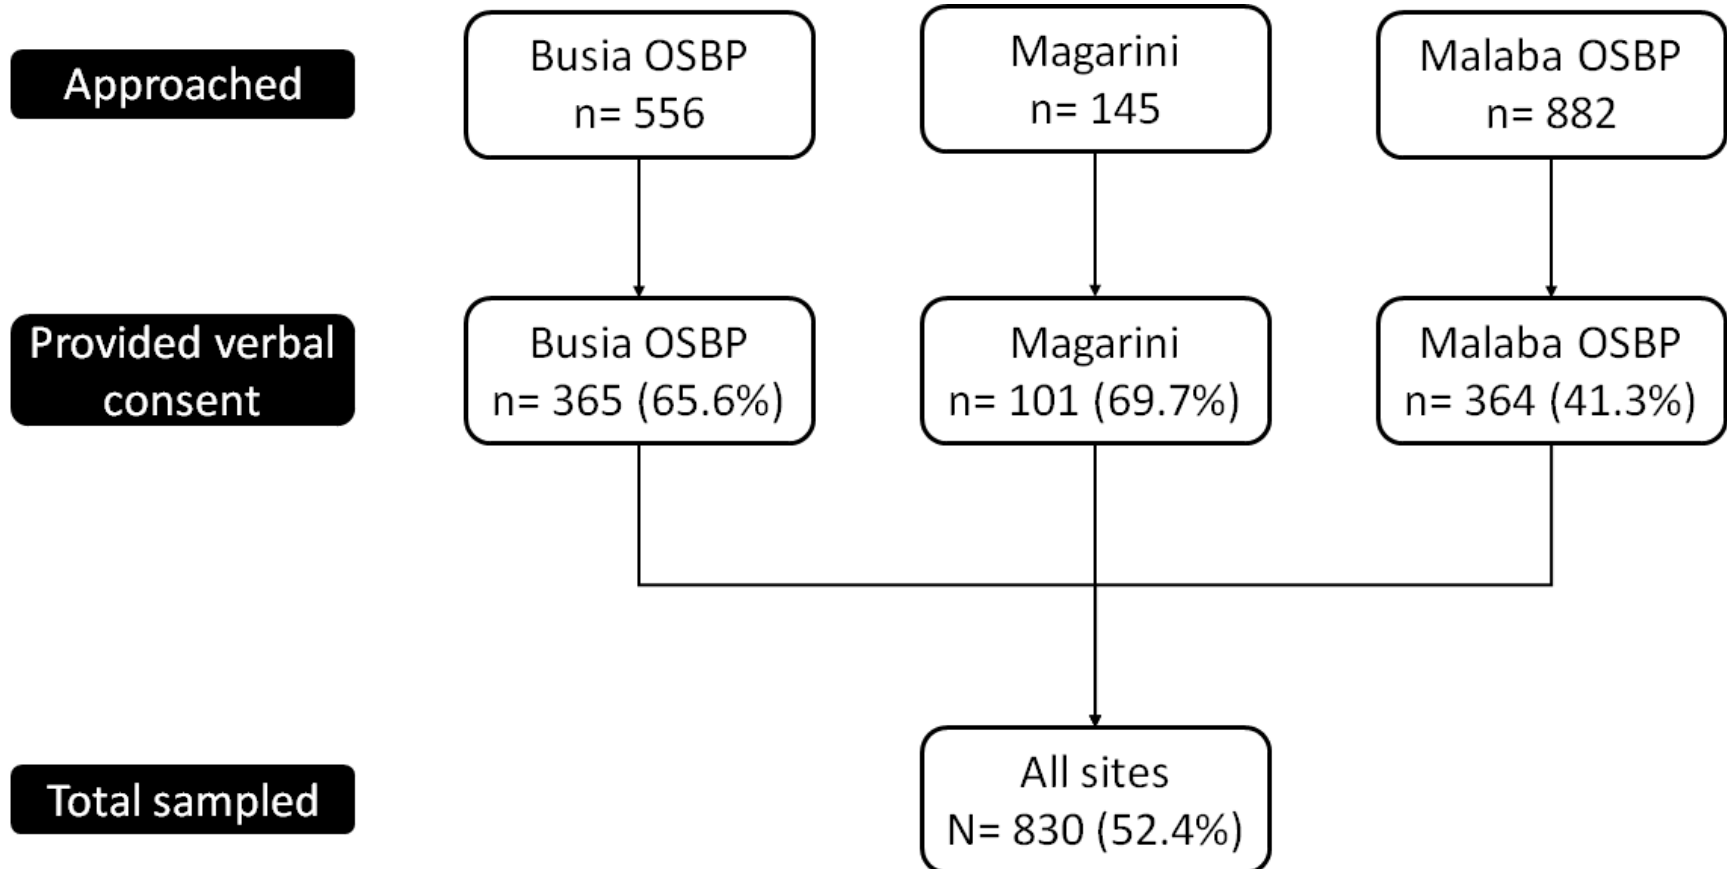

Supplementary Figure 4. Sampling by date and site

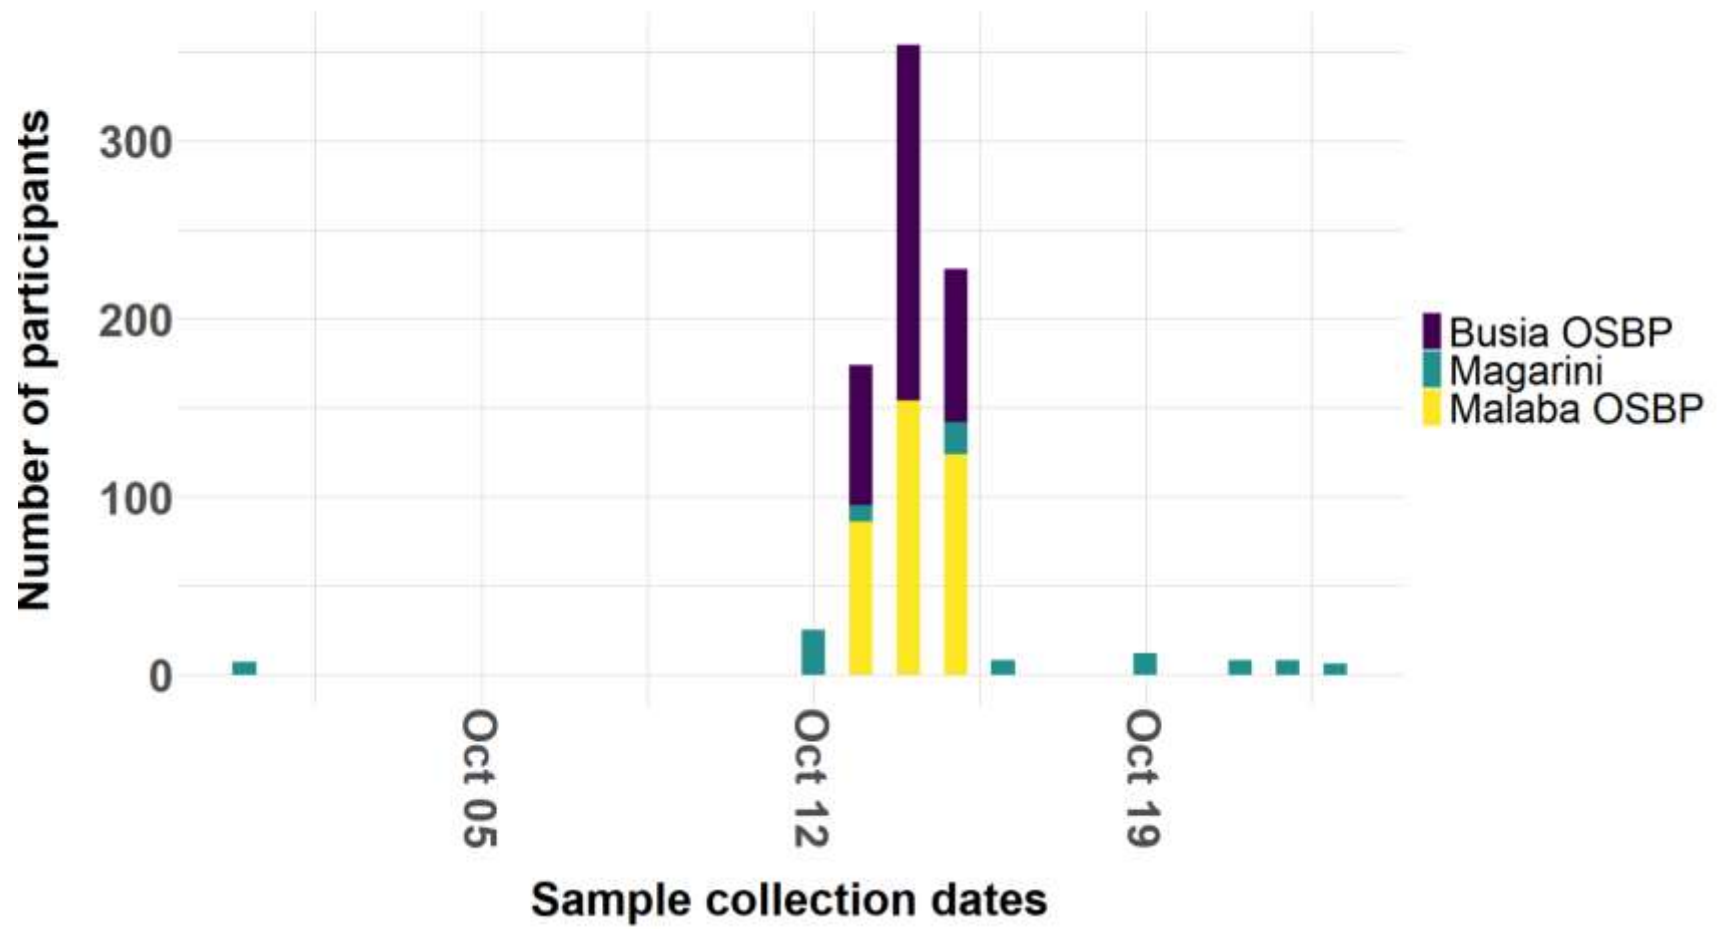



Supplementary Form 1

V4

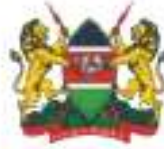

MINISTRY OF HEALTH  
Division of Disease Surveillance and Surveillance

Test Justification  
Baseline   
Follow-up

Case investigation form for 2019 Novel Coronavirus (COVID-19)

Date of reporting to national level: D[ ][ ]/M[ ][ ]/Y[ ][ ][ ][ ]

Why was the person tested for COVID-19 or investigation being conducted?

- Contact with confirmed case
- Surveillance
- Repatriation
- Presented at health facility
- Point of entry detection
- Other

Date of investigation:

D[ ][ ]/M[ ][ ]/Y[ ][ ][ ][ ]

**Section 1: Patient information**

- 1.1 Unique Case Identifier (used in county): \_\_\_\_\_
- 1.2 Full name: \_\_\_\_\_
- 1.3 Nationality: \_\_\_\_\_ Contact Phone Number: \_\_\_\_\_
- 1.4 Citizenship: \_\_\_\_\_ Email address: \_\_\_\_\_
- 1.5 Age: [ ][ ] in years
- 1.6 Sex:  Male  Female
- 1.7 Place where the case was diagnosed:  Health Facility  Household
- County: \_\_\_\_\_ Sub county: \_\_\_\_\_ Ward: \_\_\_\_\_
- 1.7.1 If health facility, name of health facility: \_\_\_\_\_
- 1.7.2 Patient usual place of residence (village/estate): \_\_\_\_\_

**Section 2: Clinical information**

**Patient clinical course**

- 2.1 Date of onset of symptoms: D [ ][ ]/M [ ][ ]/Y [ ][ ][ ][ ]
- Asymptomatic  Unknown
- 2.2 Admission to hospital:  No  Yes  Unknown
- 2.2.1 If yes, first date of admission to hospital:  
D[ ][ ]/M[ ][ ]/Y[ ][ ][ ][ ]
- 2.2.2 Name of hospital: \_\_\_\_\_
- 2.2.3 Patient taken to isolation  No  Yes  Unknown

If yes, date of isolation: D [ ] [ ]/M [ ] [ ]/Y [ ] [ ] [ ] [ ]

2.2.4 Patient admitted to ICU  No  Yes  Unknown

2.2.5 Was the patient ventilated:  No  Yes  Unknown

2.3 Health status at time of reporting:

Stable  Severely ill  Dead  Unknown

2.3.1 Outcome  Still in hospital  Discharged  Death

2.3.2 Date of outcome (discharged, death) if applicable:

D [ ] [ ]/M [ ] [ ]/Y [ ] [ ] [ ] [ ]

2.4 Patient symptoms (check all reported symptoms):

- |                                                    |                                                 |                                                      |
|----------------------------------------------------|-------------------------------------------------|------------------------------------------------------|
| <input type="checkbox"/> History of fever / chills | <input type="checkbox"/> Shortness of breath    | <input type="checkbox"/> Pain (check all that apply) |
| <input type="checkbox"/> General weakness          | <input type="checkbox"/> Diarrhea               | ( ) Muscular ( ) Chest                               |
| <input type="checkbox"/> Cough                     | <input type="checkbox"/> Nausea/vomiting        | ( ) Abdominal ( ) Joint                              |
| <input type="checkbox"/> Sore throat               | <input type="checkbox"/> Headache               |                                                      |
| <input type="checkbox"/> Runny nose                | <input type="checkbox"/> Irritability/Confusion |                                                      |
| <input type="checkbox"/> Other, specify: _____     |                                                 |                                                      |

Have the symptoms resolved? Yes  No  Unknown

If Yes, Date of symptom resolution \_\_\_\_\_ Unknown

Patient signs:

2.5 Temperature \_\_\_\_\_ °C

2.6 Check all observed signs:

- |                                                 |                                                     |                                                       |
|-------------------------------------------------|-----------------------------------------------------|-------------------------------------------------------|
| <input type="checkbox"/> Pharyngeal exudate     | <input type="checkbox"/> Coma                       | <input type="checkbox"/> Abnormal lung X-Ray findings |
| <input type="checkbox"/> Conjunctival injection | <input type="checkbox"/> Dyspnea / tachypnea        |                                                       |
| <input type="checkbox"/> Seizure                | <input type="checkbox"/> Abnormal lung auscultation |                                                       |
| <input type="checkbox"/> Other, specify: _____  |                                                     |                                                       |

2.7 Underlying conditions and comorbidity (check all that apply):

- |                                                                         |                                                          |
|-------------------------------------------------------------------------|----------------------------------------------------------|
| <input type="checkbox"/> Pregnancy (trimester: _____)                   | <input type="checkbox"/> Post-partum (< 6 weeks)         |
| <input type="checkbox"/> Cardiovascular disease, including hypertension | <input type="checkbox"/> Immunodeficiency, including HIV |
| <input type="checkbox"/> Diabetes                                       | <input type="checkbox"/> Renal disease                   |
| <input type="checkbox"/> Liver disease                                  | <input type="checkbox"/> Chronic lung disease            |
| <input type="checkbox"/> Chronic neurological or neuromuscular disease  | <input type="checkbox"/> Malignancy                      |
| <input type="checkbox"/> Smoking (current or former smoker)             |                                                          |
| <input type="checkbox"/> Other, specify: _____                          |                                                          |

### Section 3: Exposure and travel information in the 14 days prior to symptom onset (prior to reporting if asymptomatic)

3.1 Occupation: (tick any that apply)

- |                                               |                                                                                                  |
|-----------------------------------------------|--------------------------------------------------------------------------------------------------|
| <input type="checkbox"/> Student              | <input type="checkbox"/> Health care worker, Cadre _____                                         |
| <input type="checkbox"/> Working with animals | <input type="checkbox"/> Health laboratory worker <input type="checkbox"/> Other, specify: _____ |

3.2 Has the patient travelled in the 14 days prior to symptom onset?  No  Yes  Unknown

If yes, please specify the places the patient travelled:

- 1 Country \_\_\_\_\_ City \_\_\_\_\_ Date \_\_\_\_\_  
 2 \_\_\_\_\_
- 3.3 Has the patient **visited any health care facility(s)** in the 14 days prior to symptom onset?  
 No  Yes  Unknown
- 3.4 Has the patient had **close contact**<sup>1</sup> with a person with acute respiratory infection in the 14 days prior to symptom onset?  
 No  Yes  Unknown  
 If yes, contact setting (check all that apply):  
 Health care setting  Family setting  Workplace  Unknown  
 Other, specify: \_\_\_\_\_
- 3.5 Has the patient had contact with a **probable or confirmed case** in the 14 days prior to symptom onset?  
 No  Yes  Unknown  
 If yes, please list unique case identifiers of all probable or confirmed cases:  
 Case 1 identifier: \_\_\_\_\_ Case 2 identifier: \_\_\_\_\_ Case 3 identifier: \_\_\_\_\_  
 If yes, contact setting (check all that apply):  
 Health care setting  Family setting  Workplace  Unknown  Other, specify: \_\_\_\_\_  
 If yes, location/city/country for exposure: \_\_\_\_\_

#### Section 4: Laboratory Information

**Specimen collection** (To be completed by the health facility)

- 4.1 Was specimen collected?  1=Yes 2=No  
 If no, why?  
 .....
- 4.2 Date(s) of specimen collection: D[ ][ ]/M[ ][ ]/Y[ ][ ][ ][ ]
- 4.3 Specimen type:  NP Swab  OP Swab  Serum  Sputum  Tracheal Aspirate  
 Other (specify): \_\_\_\_\_
- 4.4 Date specimen sent to the lab: D[ ][ ]/M[ ][ ]/Y[ ][ ][ ][ ]  
 (To be completed by the confirming lab)
- 4.5 Date specimen received in the lab: D[ ][ ]/M[ ][ ]/Y[ ][ ][ ][ ]  
 Time[ ][ ]-[ ][ ]
- 4.6 Name of confirming lab: \_\_\_\_\_
- 4.7 Please specify which assay was used: \_\_\_\_\_
- 4.8 Preliminary lab results: \_\_\_\_\_
- 4.9 Has sequencing been done?  Yes  No  Unknown
- 4.10 Date of laboratory confirmation: D[ ][ ]/M[ ][ ]/Y[ ][ ][ ][ ]

<sup>1</sup> 'Close contact' is defined as: 1. Health care associated exposure, including providing direct care for COVID-19 patients, working with health care workers infected with novel coronavirus, visiting patients or staying in the same close environment of a COVID-19 patient. 2. Working together in close proximity or sharing the same classroom environment with a with COVID-19 patient. 3. Traveling together with COVID-19 patient in any kind of conveyance. 4. Living in the same household as a COVID-19 patient.

**Supplementary Form 2**

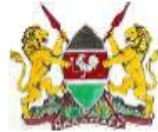

**MINISTRY OF HEALTH**

**Version 2.0**

**COVID – 19 Laboratory Request Form**

|                            |                          |                                 |                        |
|----------------------------|--------------------------|---------------------------------|------------------------|
| Site Name/Facility _____   | Contact Person _____     | Phone# _____                    | Date of Dispatch _____ |
| Email Address _____        | County _____             | Sub-County _____                |                        |
| Date Sample Received _____ | Shipment Temp. Max _____ | Min _____                       | Ambient _____          |
| Collected By: _____        |                          | Date of Sample Collection _____ |                        |

| # | Case ID/ | Type of Test Initial/ Repeat | Sample No | Full Name | ID PP No | Temp | Age | Sex M/F | Phone No. | Occupation | Nationality | County Residence | Sub-County Of Residence | Village/ Estate | Contact With case | Date Symptom Onset | Symptoms (Cough, Fever, DIB etc) | Type of Sample( OP/NP/ Blood) |
|---|----------|------------------------------|-----------|-----------|----------|------|-----|---------|-----------|------------|-------------|------------------|-------------------------|-----------------|-------------------|--------------------|----------------------------------|-------------------------------|
| 1 |          |                              |           |           |          |      |     |         |           |            |             |                  |                         |                 |                   |                    |                                  |                               |
| 2 |          |                              |           |           |          |      |     |         |           |            |             |                  |                         |                 |                   |                    |                                  |                               |
| 3 |          |                              |           |           |          |      |     |         |           |            |             |                  |                         |                 |                   |                    |                                  |                               |
| 4 |          |                              |           |           |          |      |     |         |           |            |             |                  |                         |                 |                   |                    |                                  |                               |
| 5 |          |                              |           |           |          |      |     |         |           |            |             |                  |                         |                 |                   |                    |                                  |                               |
| 6 |          |                              |           |           |          |      |     |         |           |            |             |                  |                         |                 |                   |                    |                                  |                               |
| 7 |          |                              |           |           |          |      |     |         |           |            |             |                  |                         |                 |                   |                    |                                  |                               |

## References

1. Northern Corridor Transit and Transport Coordination Authority. *Northern Corridor Roads Network*. [cited 2020 December 17]; Available from: <http://www.ttcanc.org/maps.php>
